# Supplementary material
Source: publisher figshare collection journal article supplement (https://rs.figshare.com/ndownloader/files/14801543)
Supplement: Supplementary file 1 [file 14801543]

Supplemental Table 1 – Specimen information - Grey shading indicates fangs used in second set of experiments, with force measurements from both experiments

| Specimen Number | Species | Fang Length (mm) | Included Angle (°) | Sharpness Index | Surface Area (mm²) | Mean F to puncture (N) |
| --- | --- | --- | --- | --- | --- | --- |
| FMNH154895 | *Bitis arietans* | 11.47 | 24.3905 | 0.304414 | 0.008054 | 0.033100 |
| FMNH22258 | *Bitis arietans* | 10.47 | 29.864 | 0.267613 | 0.001273 | 0.040064 |
| FMNH22254 | *Bitis gabonica* | 20.45 | 63.0475 | 0.197422 | 0.004074 | 0.121457 |
|  |  |  |  |  |  | 0.084067 |
| NA | *Bitis gabonica* | 22.5 | 61.1515 | 0.371736 | 0.002899 | 0.109133 |
| FMNH20641 | *Bothrops asper* | 19.03 | 32.388 | 0.259300 | 0.000753 | 0.047529 |
| FMNH31167 | *Bothrops asper* | 22.61 | 42.619 | 0.124330 | 0.000904 | 0.049393 |
| FMNH51658 | *Bothrops atrox* | 10.6 | 28.214 | 0.203753 | 0.000451 | 0.033143 |
|  |  |  |  |  |  | 0.036567 |
| FMNH165563 | *Bothrops brazili* | 21.84 | 40.242 | 0.199210 | 0.001074 | 0.040414 |
| FMNH9742 | *Bothrops sp* | 16.84 | 43.5575 | 0.167227 | 0.000696 | 0.051564 |
| FMNH55888 | *Bothrops punctatus* | 13.6 | 27.732 | 0.130676 | 0.000356 | 0.033964 |
| FMNH51640 | *Crotalus adamanteus* | 17.53 | 44.2175 | 0.305138 | 0.001099 | 0.057043 |
| FMNH22331 | *Crotalus atrox* | 14.1 | 55.015 | 0.245410 | 0.000912 | 0.057079 |
| FMNH167435 | *Crotalus molossus* | 11.02 | 33.864 | 0.174771 | 0.000781 | 0.043914 |
| FMNH154896 | *Daboia russellii* | 11.77 | 30.8175 | 0.217892 | 0.000817 | 0.035893 |
|  |  |  |  |  |  | 0.043533 |
| FMNH22425 | *Daboia russellii* | 8.62 | 26.7765 | 0.291147 | 0.001311 | 0.043171 |
| FMNH31007 | *Daboia russellii* | 10.73 | 28.6305 | 0.128266 | 0.001241 | 0.043571 |
| FMNH31363 | *Daboia russellii* | 10.35 | 31.6495 | 0.177578 | 0.000528 | 0.038629 |
| FMNH25177 | *Deinagkistrodon acutus* | 14.62 | 28.1655 | 0.279184 | 0.001056 | 0.034643 |
| FMNH121567 | *Echis carinatus* | 7.14 | 26.887 | 0.254892 | 0.000667 | 0.023707 |
| FMNH73543 | *Echis carinatus* | 7.94 | 23.6625 | 0.115762 | 0.000310 | 0.013929 |
|  |  |  |  |  |  | 0.013867 |
| FMNH72032 | *Echis coloratus* | 9.51 | 26.114 | 0.224474 | 0.000471 | 0.026536 |
| FMNH229688 | *Lachesis muta* | 19.63 | 38.974 | 0.272794 | 0.000589 | 0.043829 |
|  |  |  |  |  |  | 0.034078 |
| FMNH31174 | *Lachesis muta* | 19.75 | 52.3305 | 0.269579 | 0.006746 | 0.047293 |
|  |  |  |  |  |  | 0.030389 |
| FMNH31749 | *Lachesis muta* | 20.35 | 37.416 | 0.323747 | 0.003138 | 0.060179 |
| FMNH31750 | *Lachesis muta* | 20.85 | 46.663 | 0.182326 | 0.000783 | 0.049850 |
| FMNH98753 | *Lachesis muta* | 22.59 | 46.0165 | 0.245613 | 0.000832 | 0.057429 |
| FMNH65218 | *Macrovipera lebetina* | 6.93 | 29.4465 | 0.142093 | 0.000390 | 0.032371 |
| FMNH72584 | *Protobothrops flavoviridis* | 19.01 | 35.575 | 0.240382 | 0.000784 | 0.033029 |
| FMNH140101 | *Protobothrops mucrosquamatus* | 11.98 | 25.997 | 0.182130 | 0.000273 | 0.025793 |
| FMNH71644 | *Parias sumatranus* | 15.67 | 29.5935 | 0.205384 | 0.000543 | 0.020929 |
|  | | | | | | | |
